# Supplementary material for: Cross-National Systematic Review of Neonatal Mortality and Postnatal Newborn Care: Special Focus on Pakistan
Source: MDPI journal article supplement (doi:10.3390/ijerph14121442), 2017-11-23
Supplement: s1 [file s1]

# Cross-national Systematic Review on Neonatal Mortality and Postnatal Newborn care: Special focus on Pakistan

Supplementary Data (Web Only Files)

Mansoor Ahmed and Youngjoon Won\*

**Table S1.** Google Scholar search strategy for studies to include in systematic review.

|                                                                                                                                                                                                                                                                                                                                        |
|----------------------------------------------------------------------------------------------------------------------------------------------------------------------------------------------------------------------------------------------------------------------------------------------------------------------------------------|
| <ol style="list-style-type: none"><li>1. Pakistan</li><li>2. Healthcare OR health care</li><li>3. National OR provincial OR regional</li><li>4. Maternal and child health</li><li>5. Maternal newborn and child health</li><li>6. Health policy</li><li>7. Health program</li></ol> <p>#1 AND #2 AND #3 AND (#4 OR #5 OR #6 OR #7)</p> |
|----------------------------------------------------------------------------------------------------------------------------------------------------------------------------------------------------------------------------------------------------------------------------------------------------------------------------------------|
